# Supplementary material
Source: PubMed Central journal article supplement (PMC1805609)

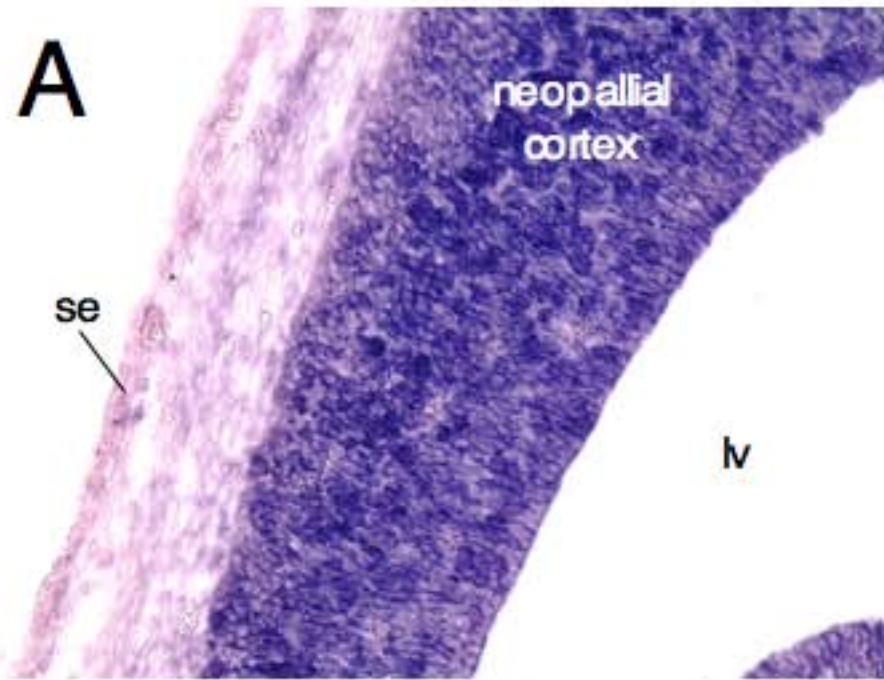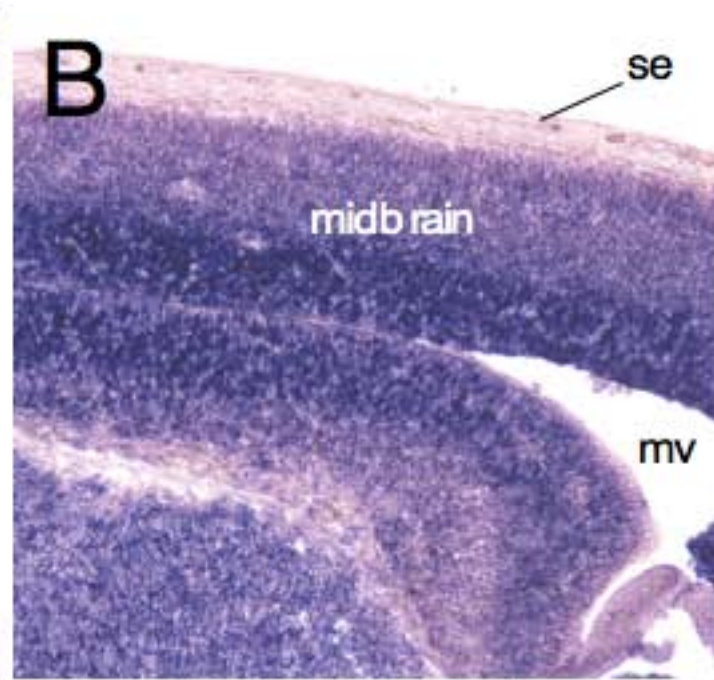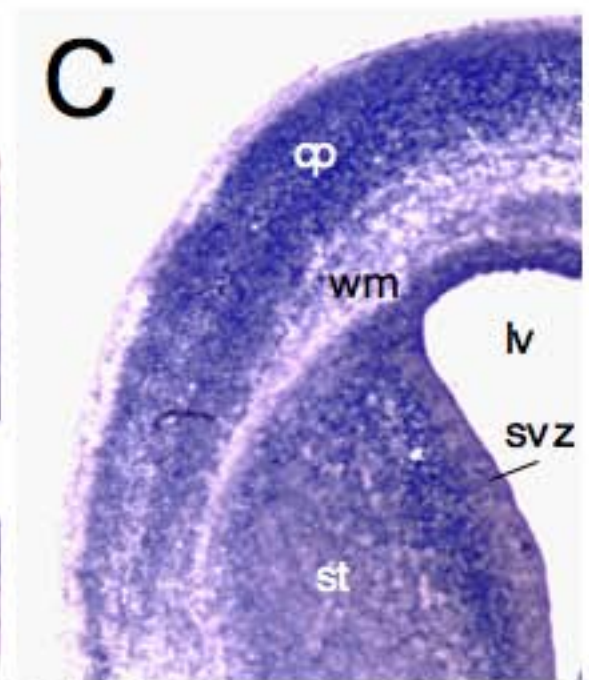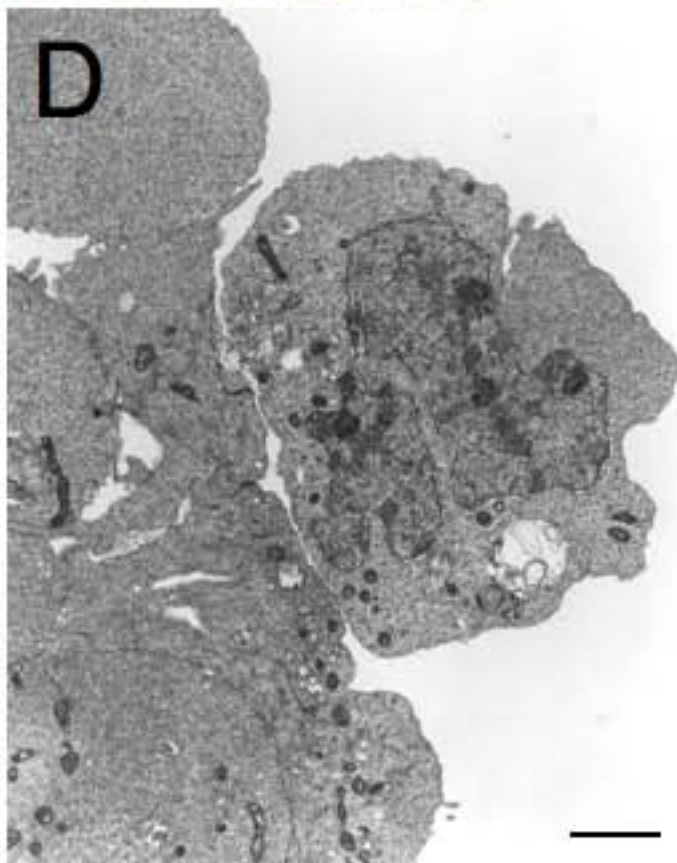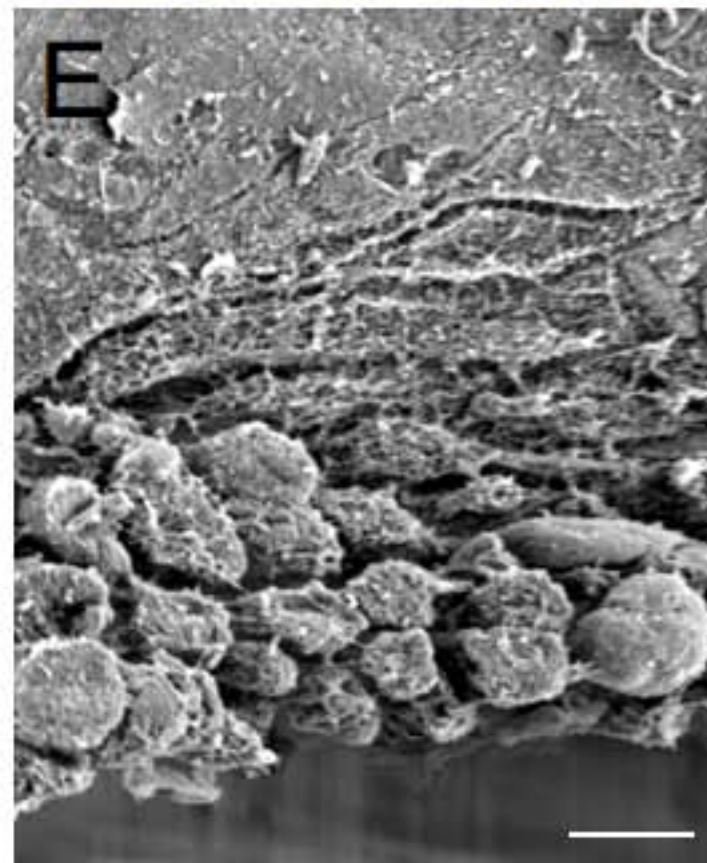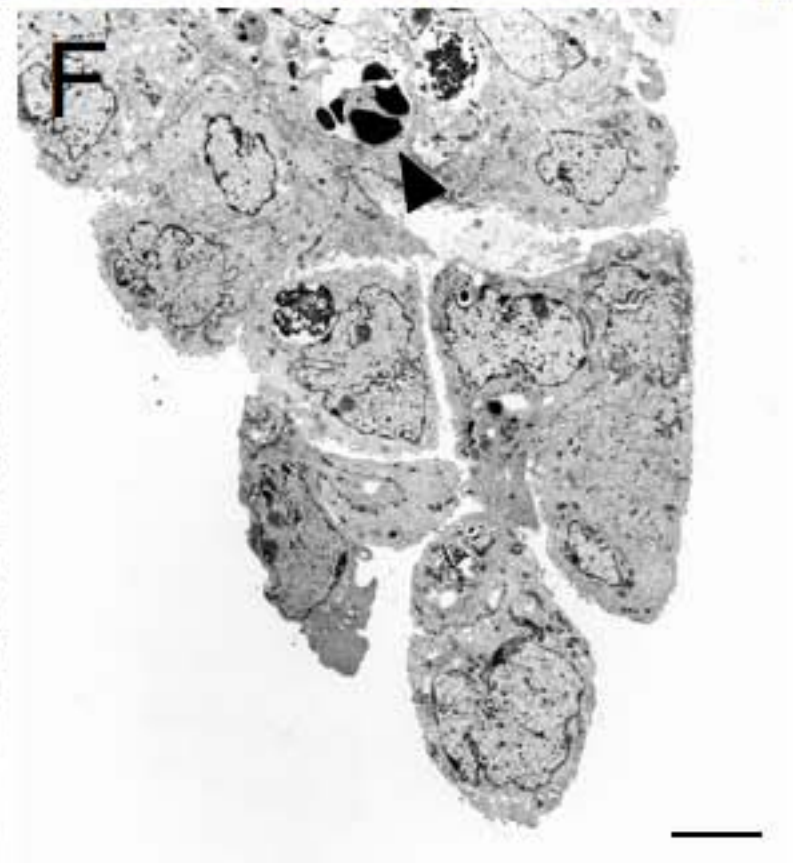

Supplement: pnas_0700044104_1.pdf [file pnas_0700044104_1.pdf]

**Paxillin**

**Pax/GFP/DAPI**

**Paxillin**

**Pax/GFP/DAPI**

**Vector**

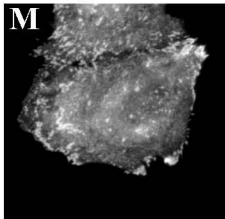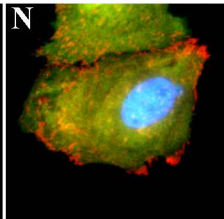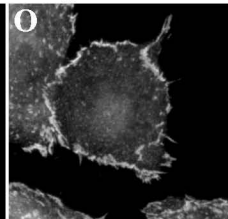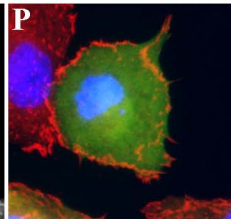

**NF2DN**

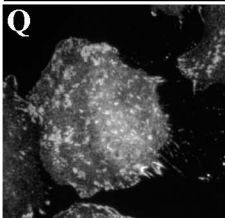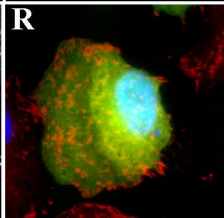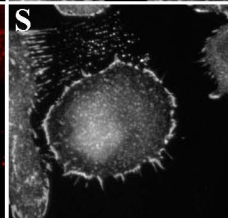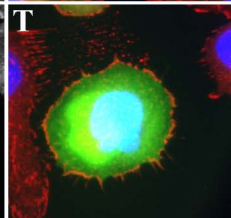

Supplement: pnas_0700044104_10.pdf [file pnas_0700044104_10.pdf]

Control

*NesCre1<sup>m</sup>**NesCre1<sup>P</sup>*

Control

*NesCre1<sup>m</sup>**NesCre1<sup>P</sup>*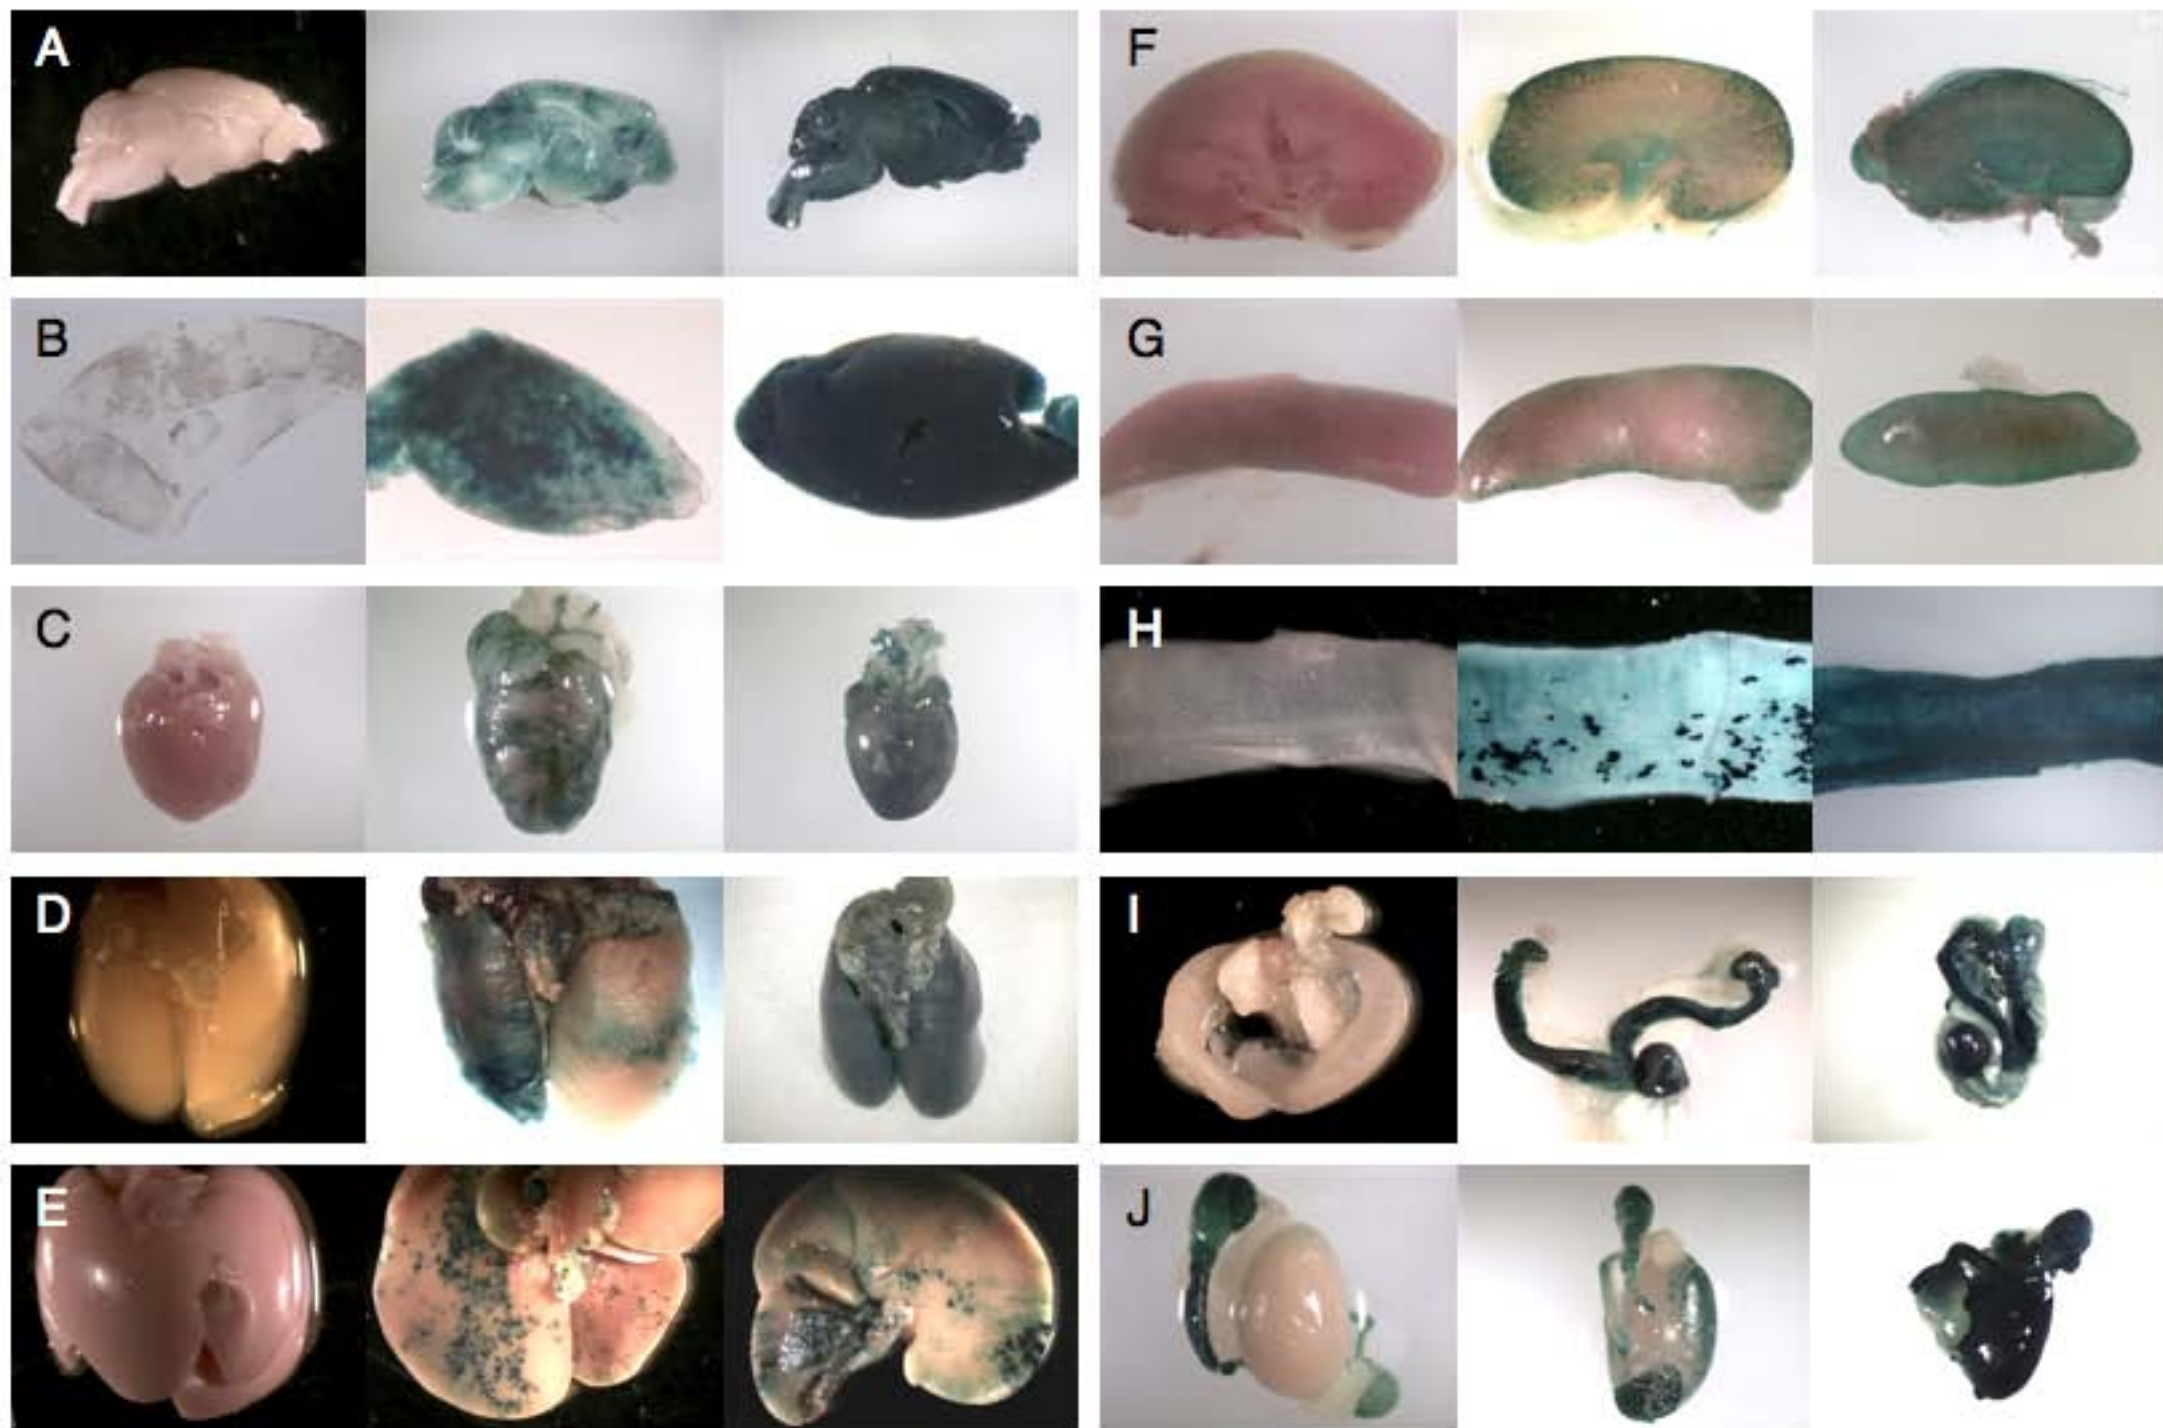

Supplement: pnas_0700044104_2.pdf [file pnas_0700044104_2.pdf]

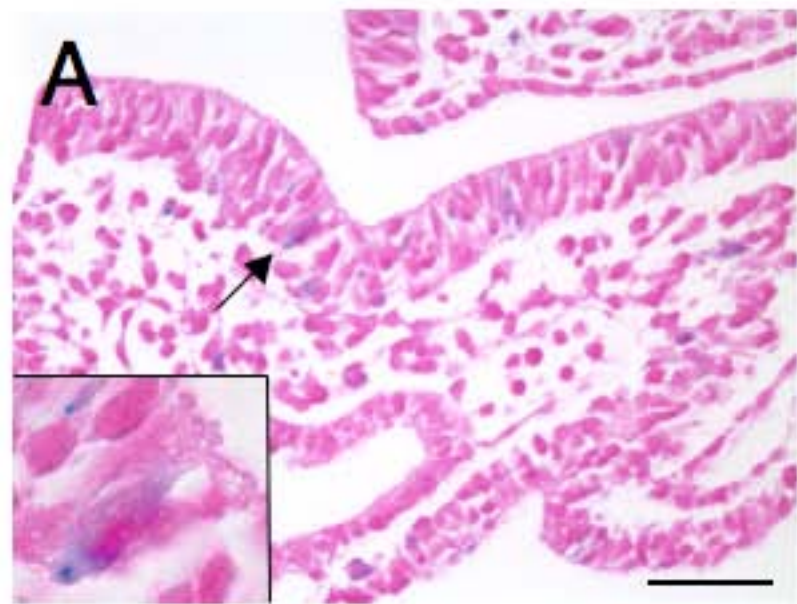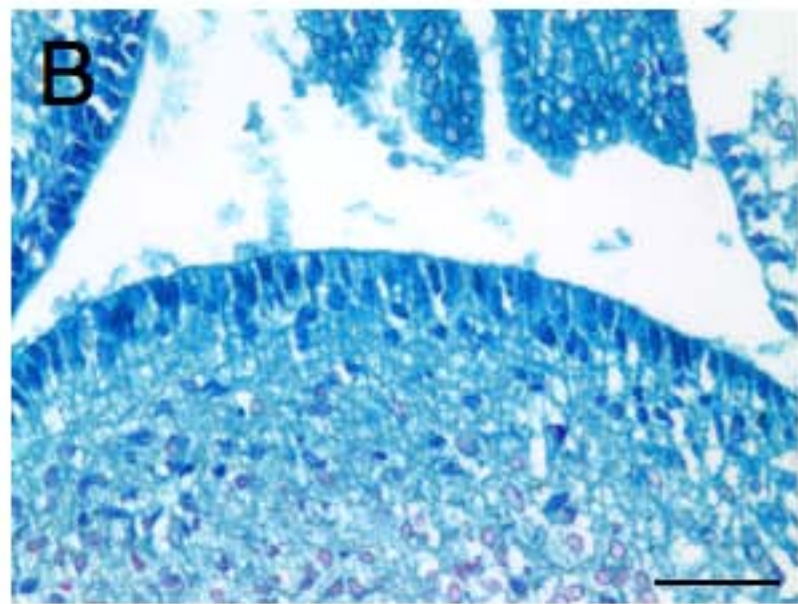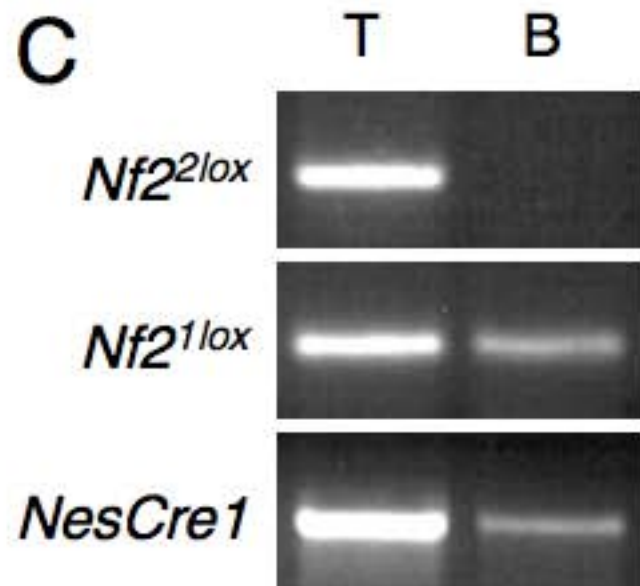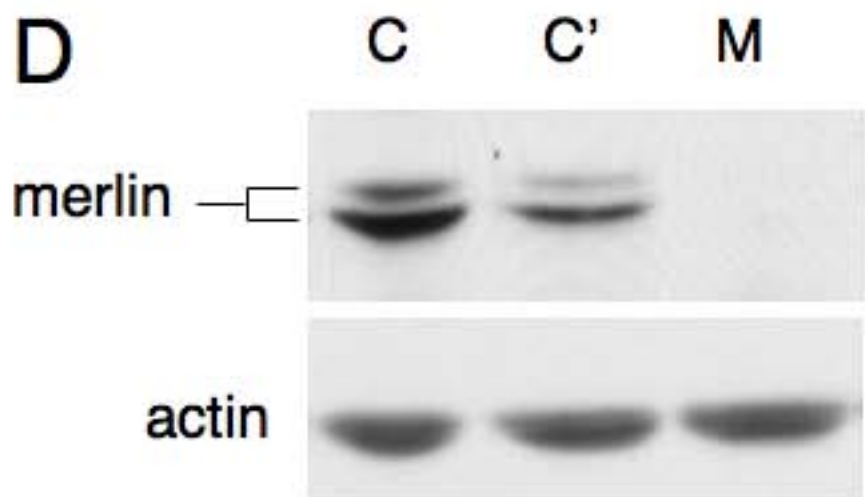

Supplement: pnas_0700044104_3.pdf [file pnas_0700044104_3.pdf]

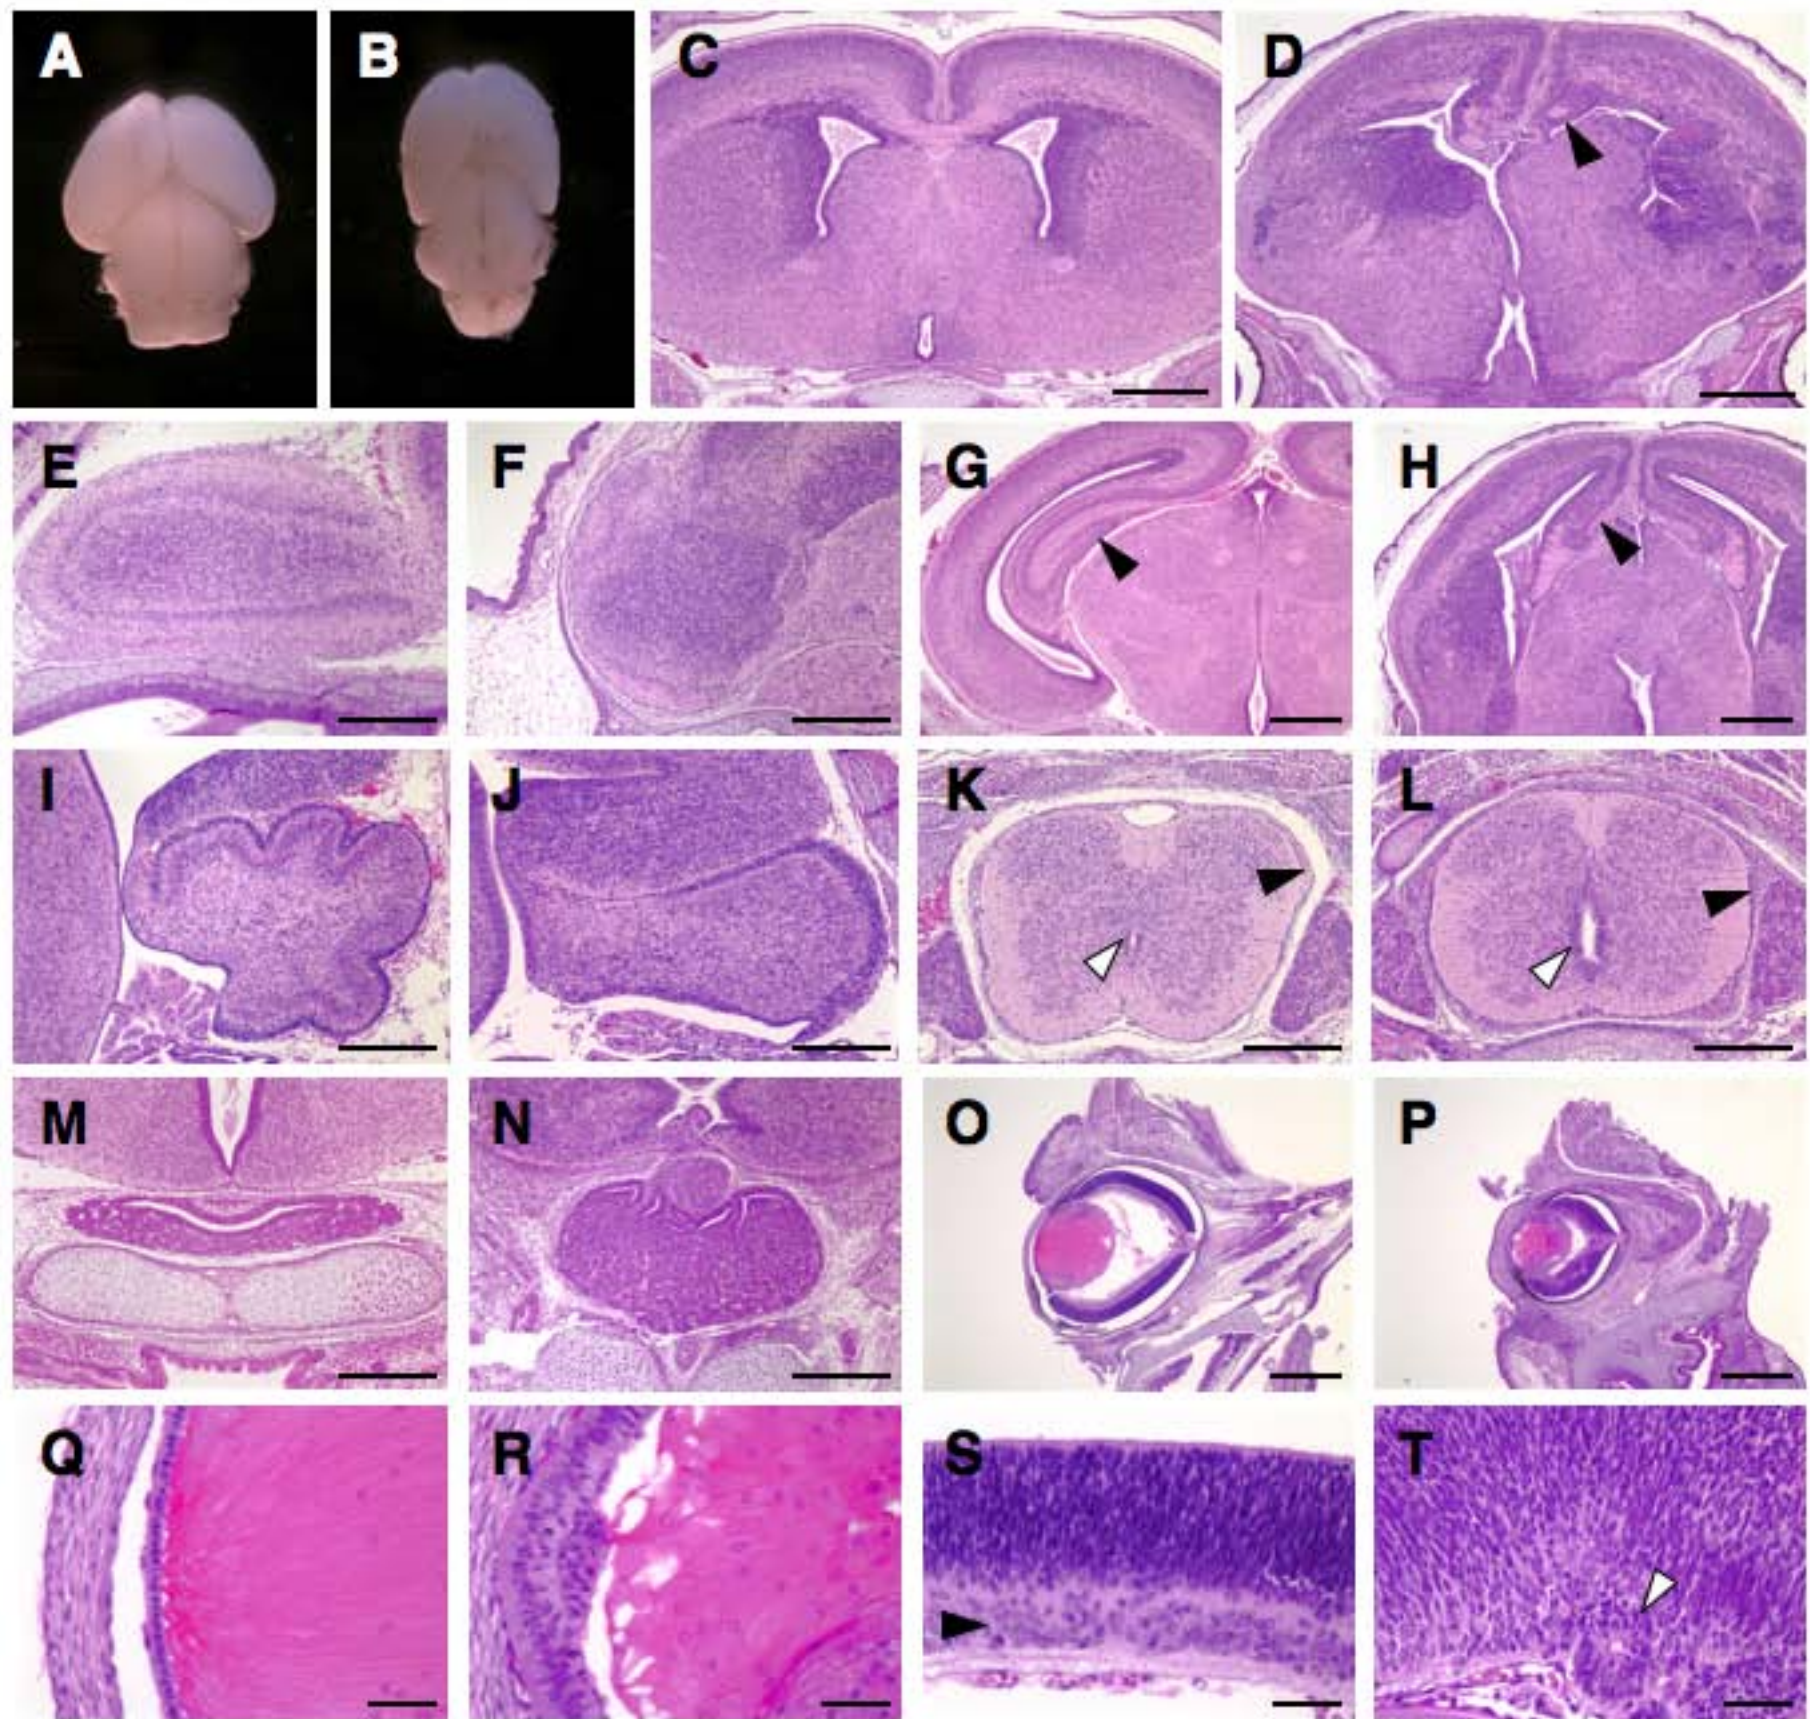

Supplement: pnas_0700044104_4.pdf [file pnas_0700044104_4.pdf]

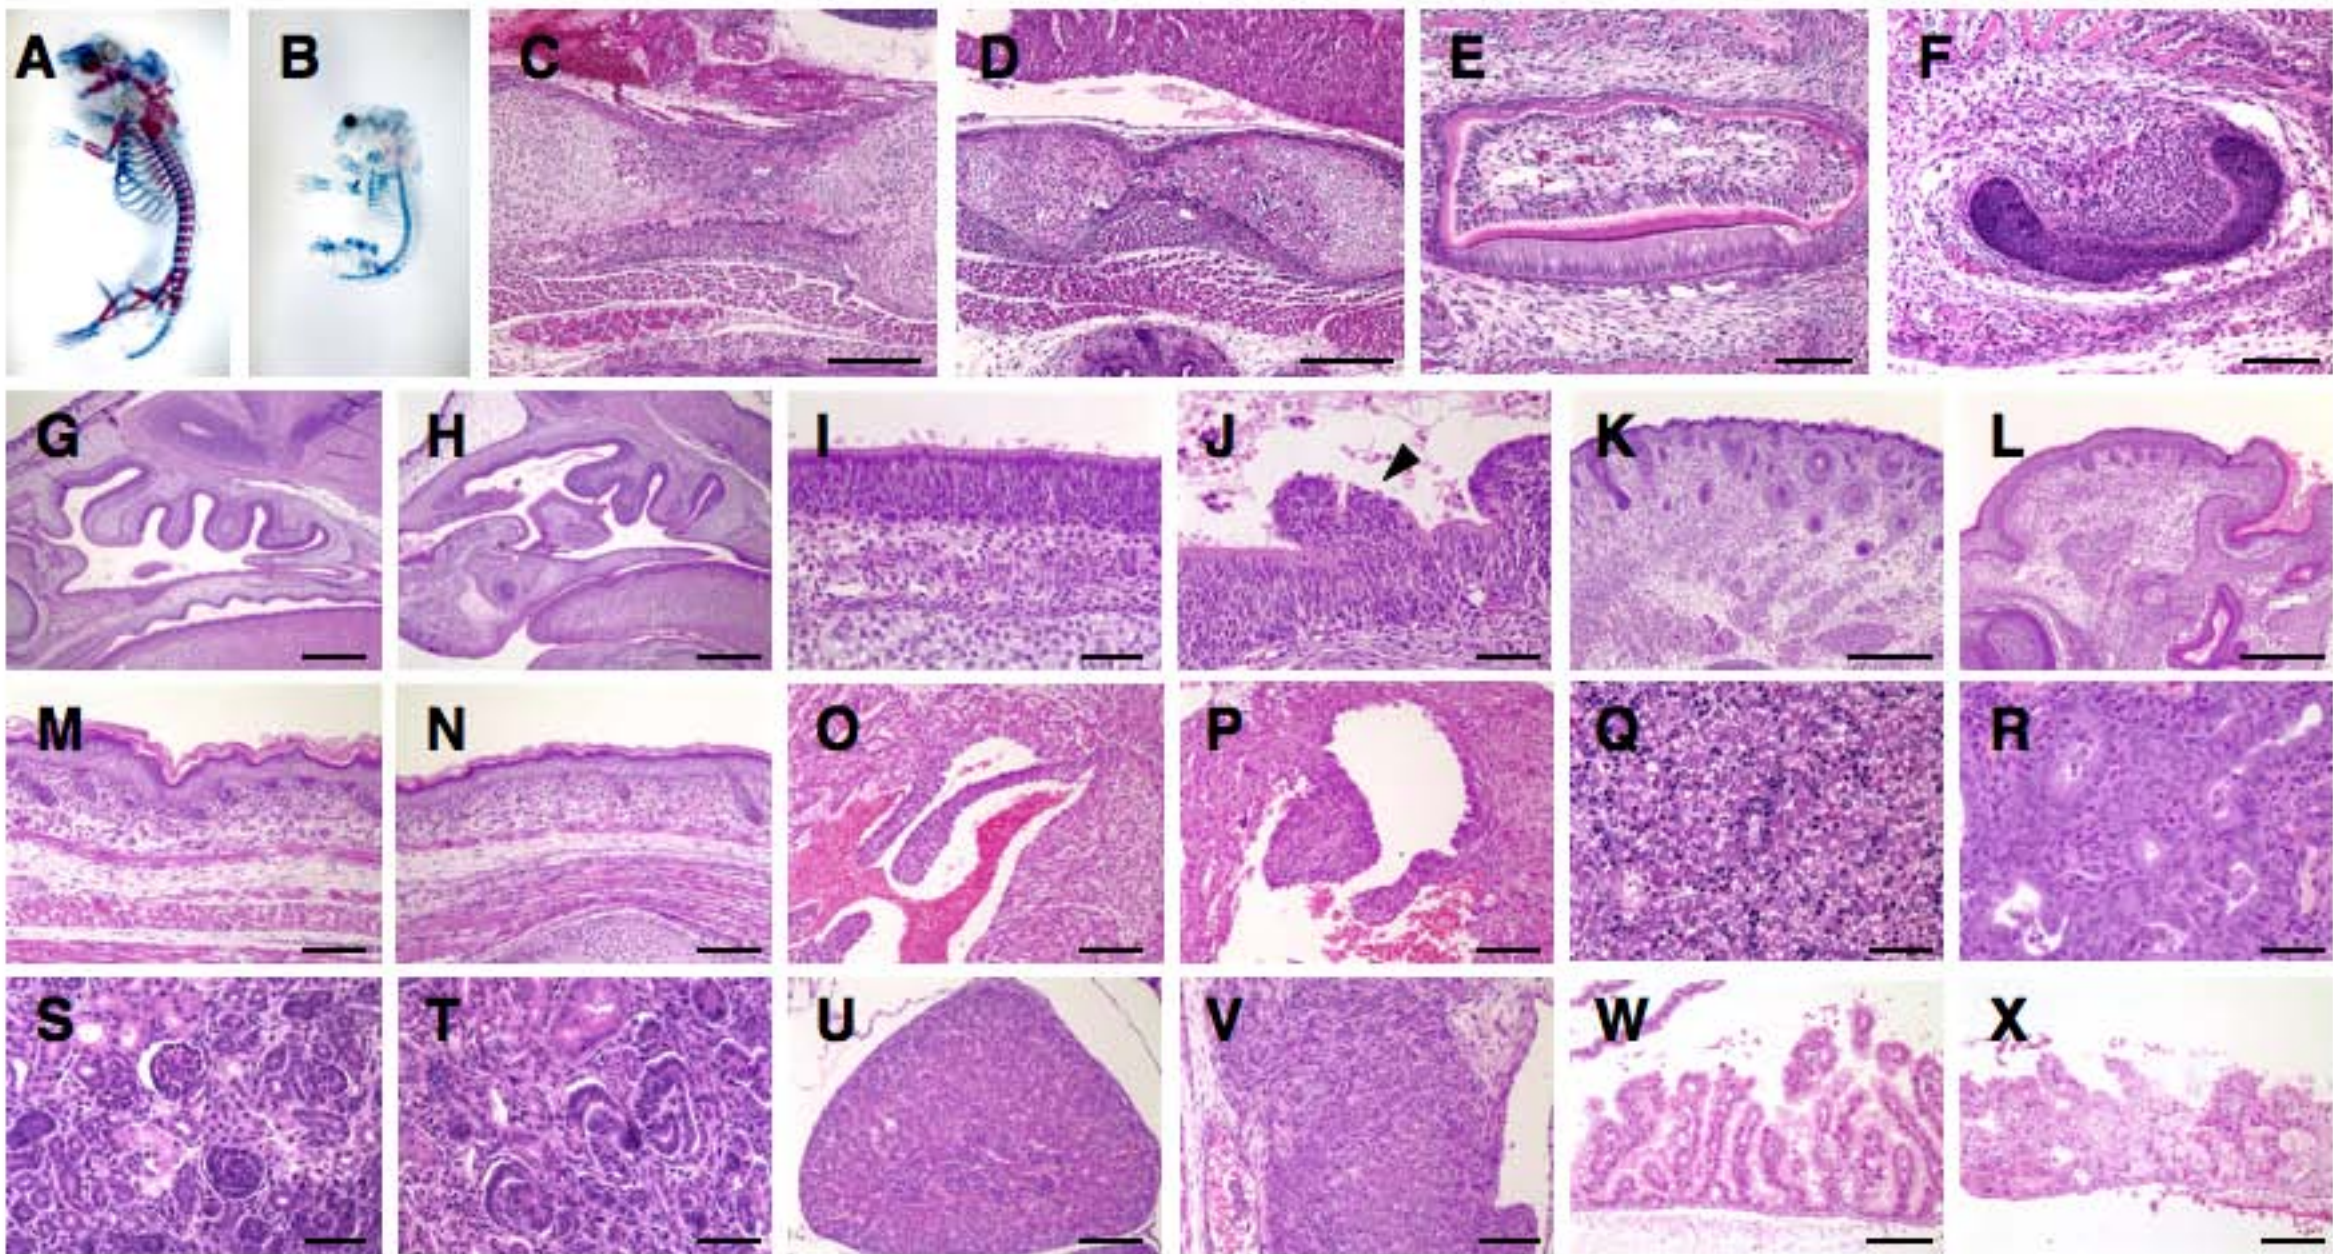

Supplement: pnas_0700044104_5.pdf [file pnas_0700044104_5.pdf]

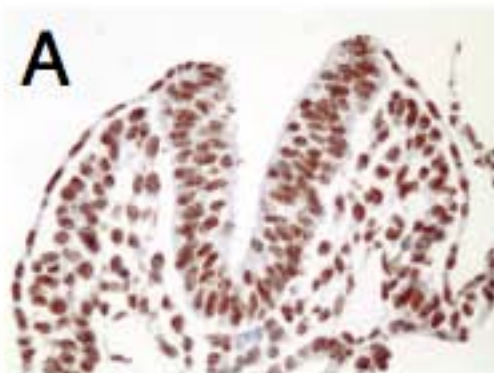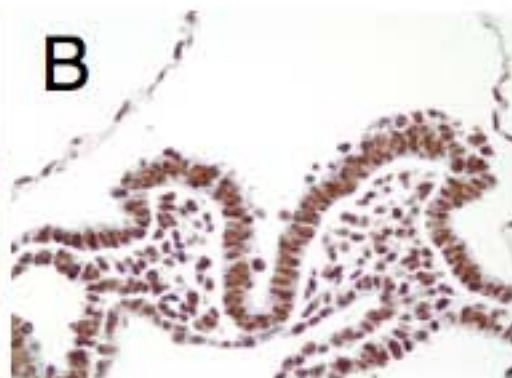

**C**

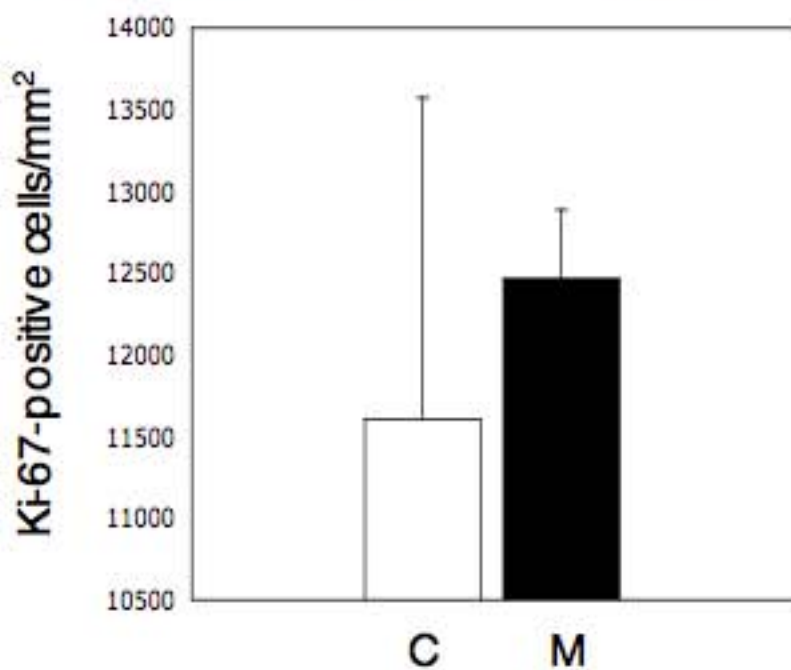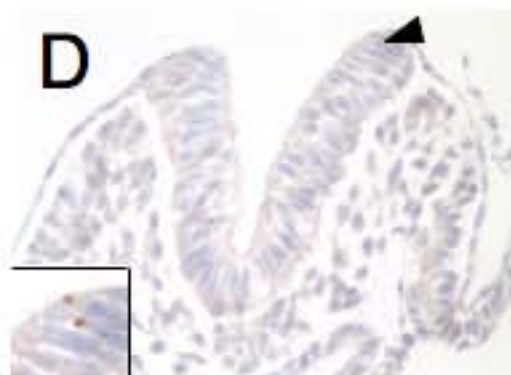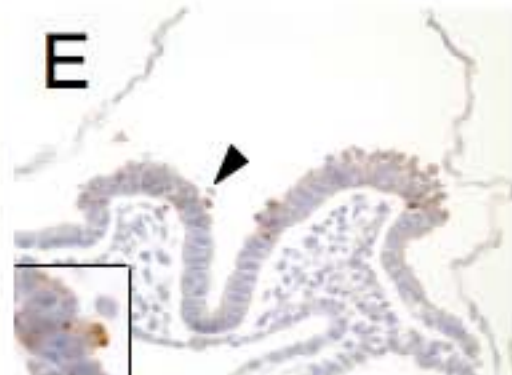

Supplement: pnas_0700044104_6.pdf [file pnas_0700044104_6.pdf]

**A**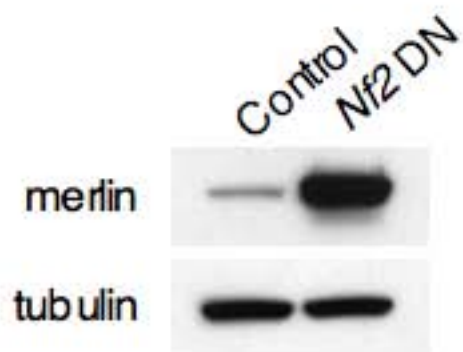**B**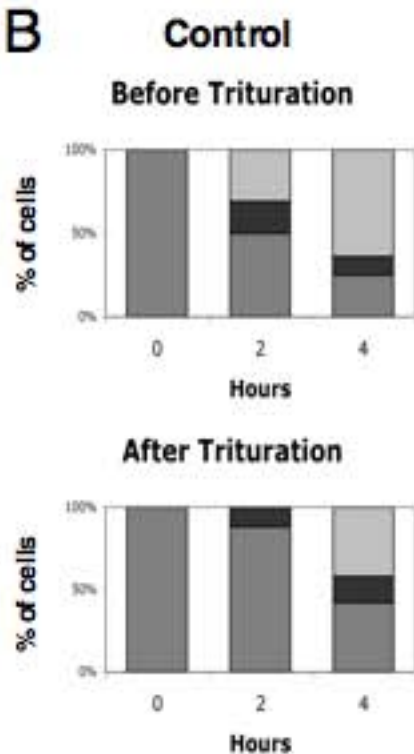**C**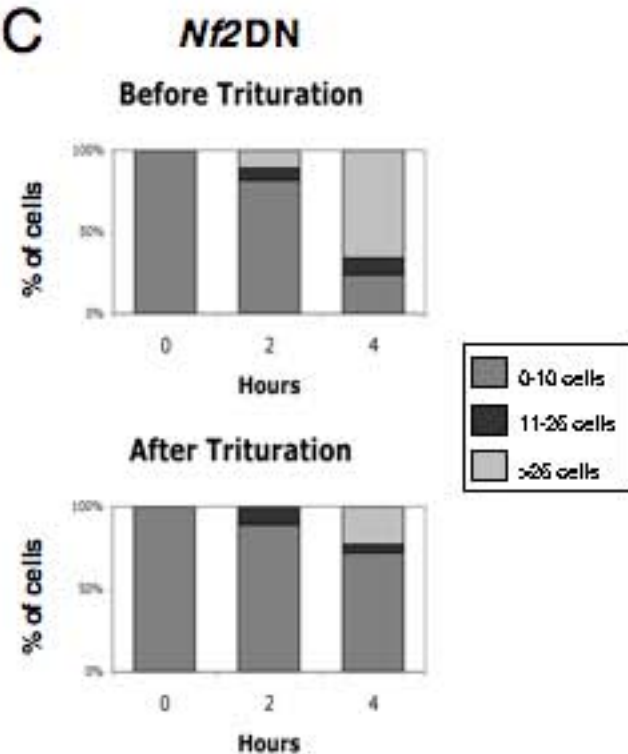**D**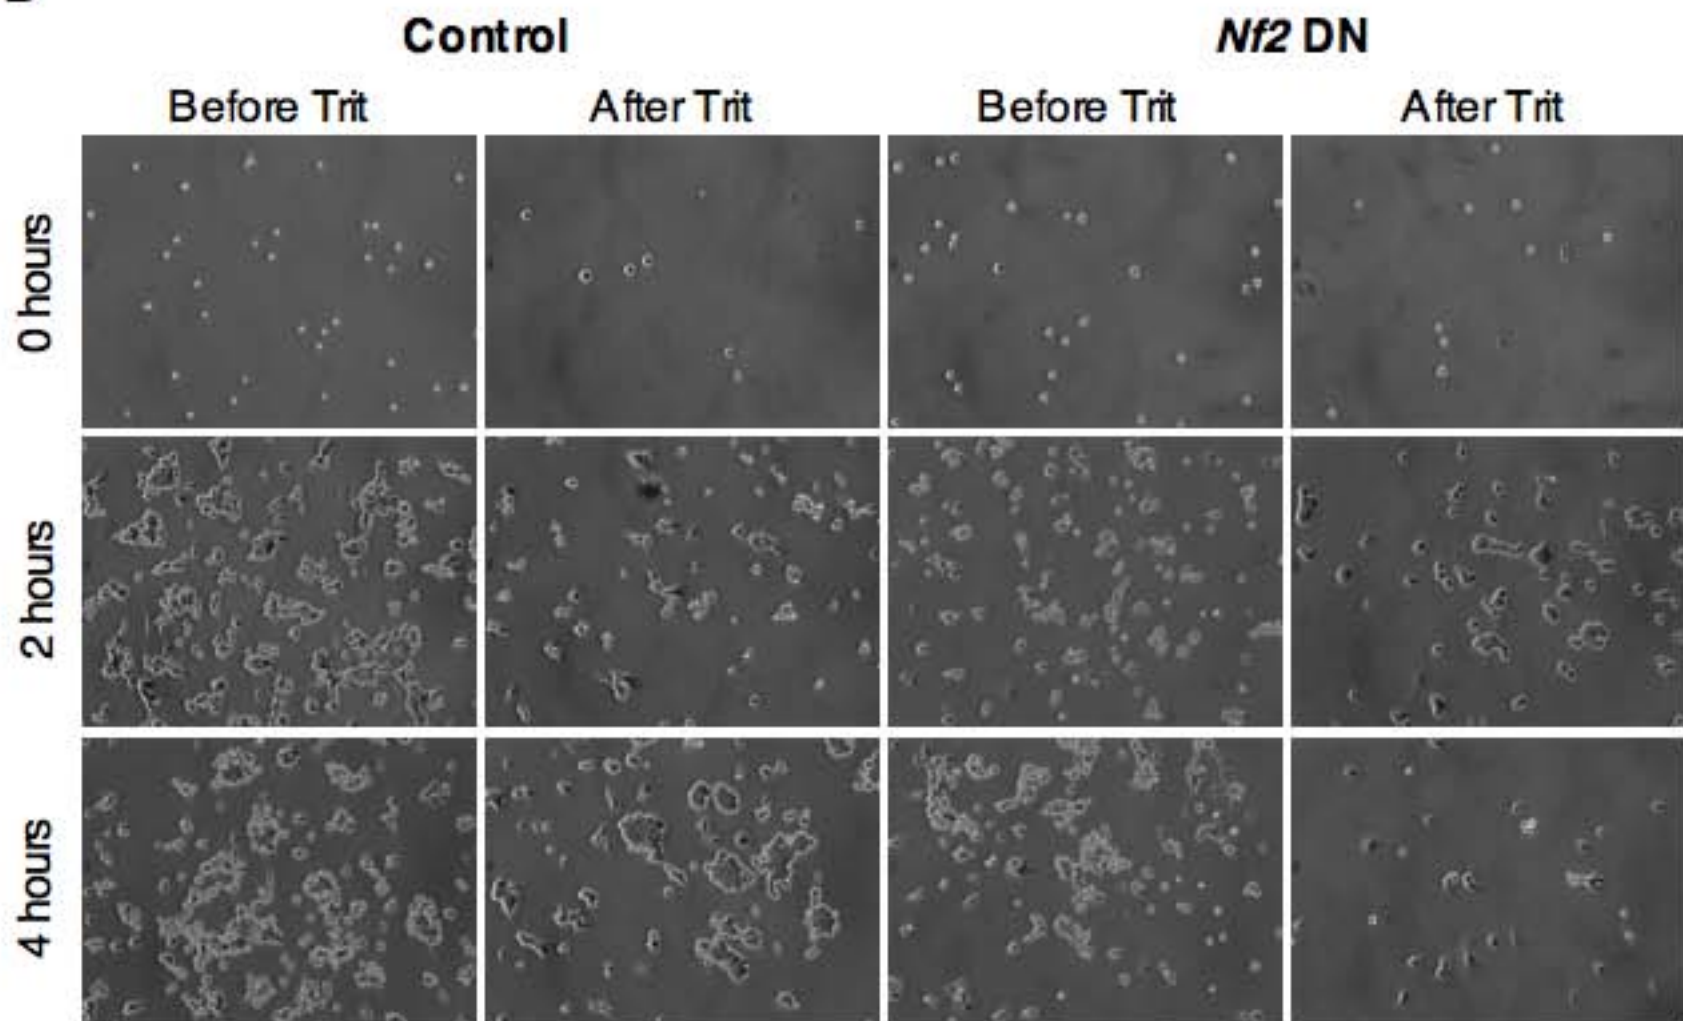

Supplement: pnas_0700044104_7.pdf [file pnas_0700044104_7.pdf]

pIREShrGFPII

Vector only

GFP

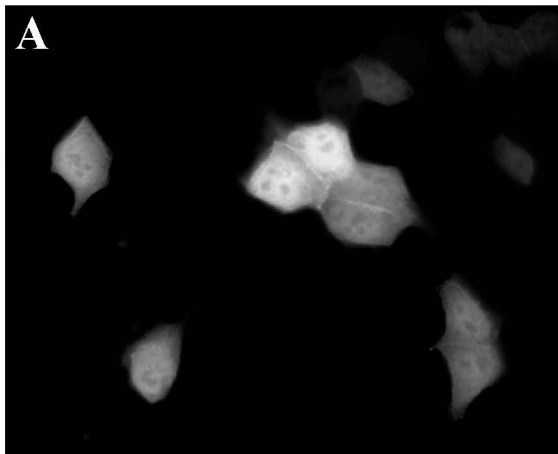

$\beta$ -catenin

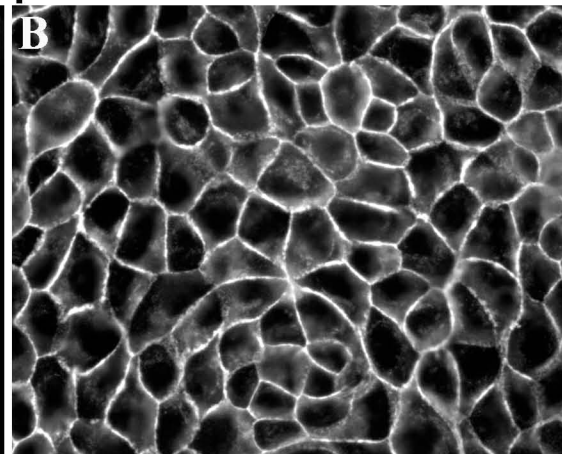

GFP/ $\beta$ -cat/DAPI

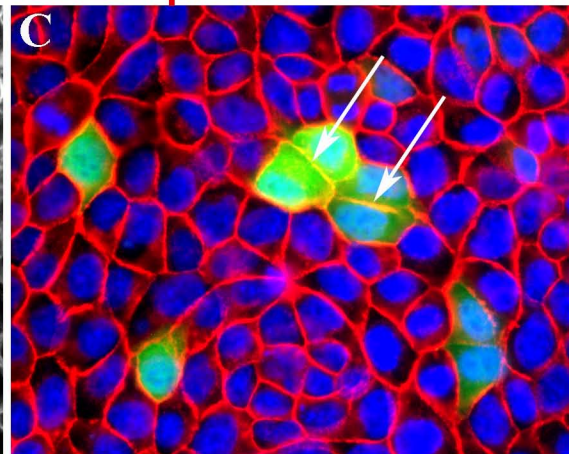

pIREShrGFPII-NF2DN

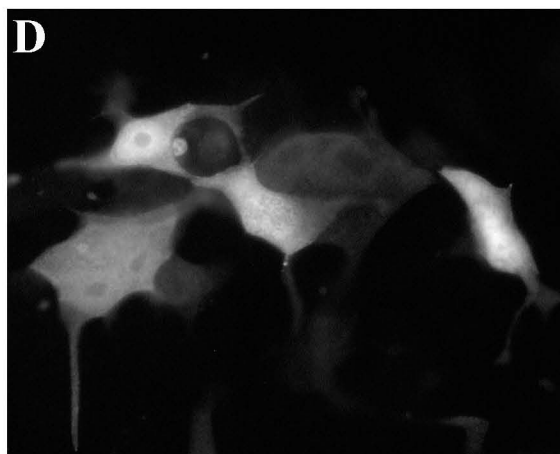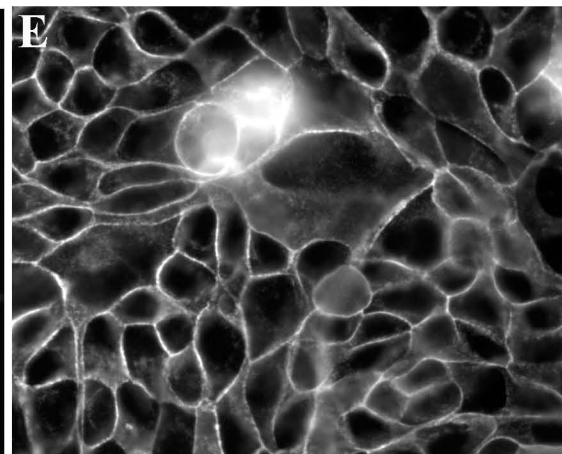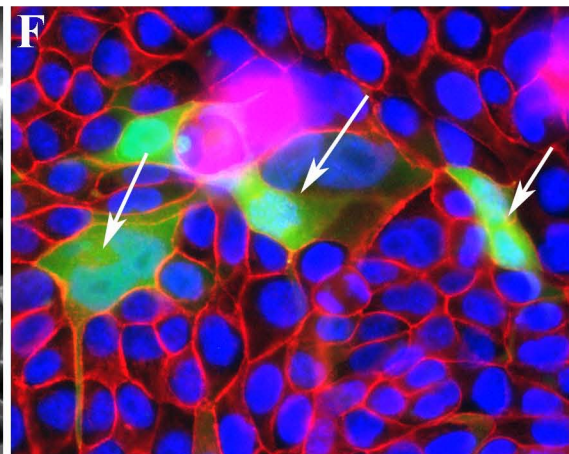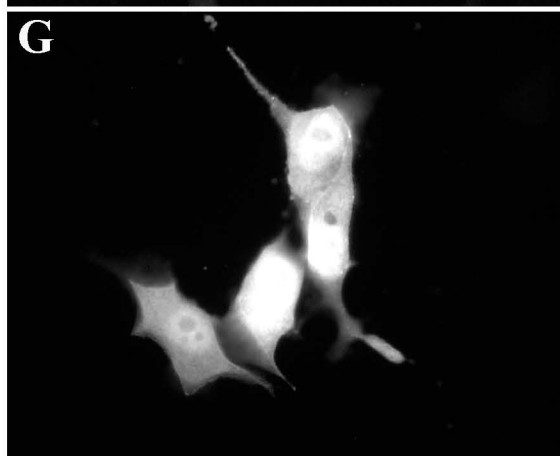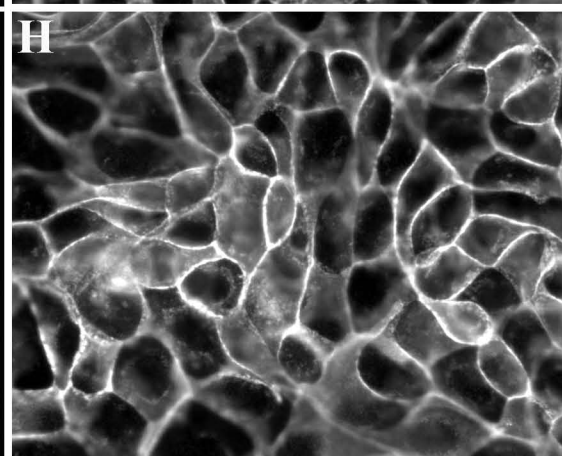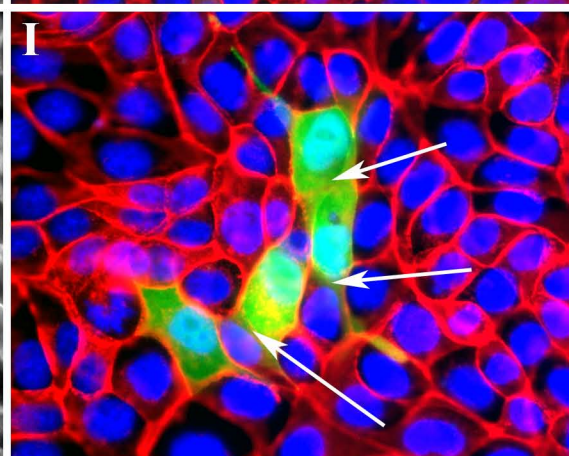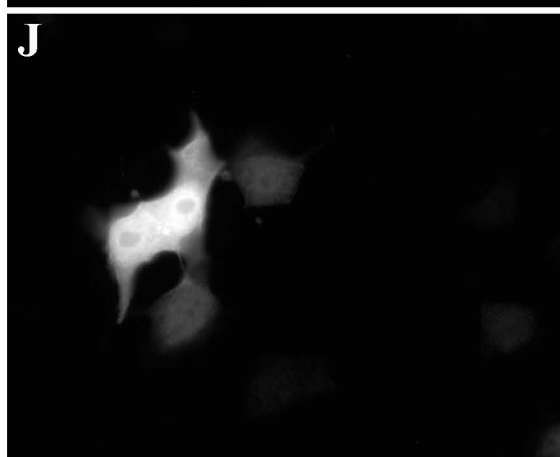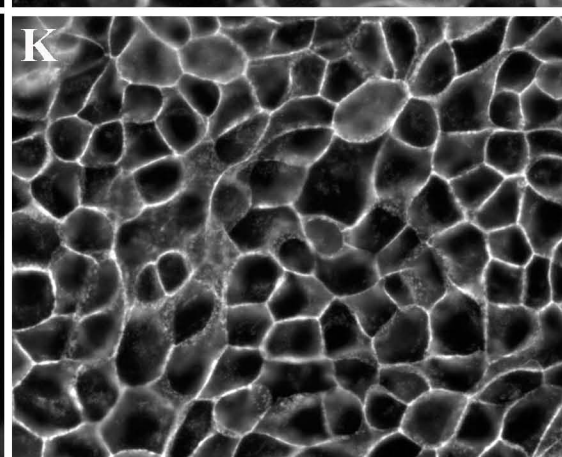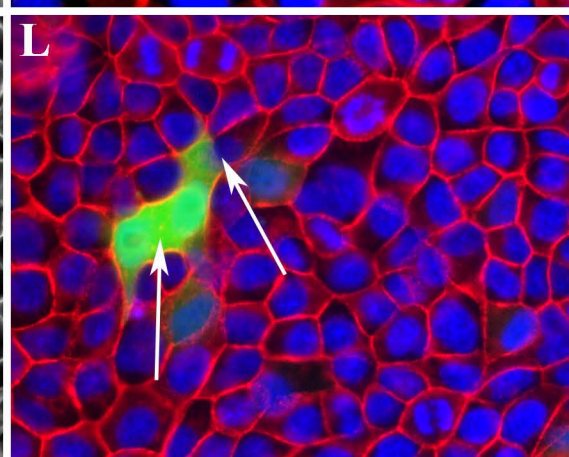

Supplement: pnas_0700044104_8.pdf [file pnas_0700044104_8.pdf]

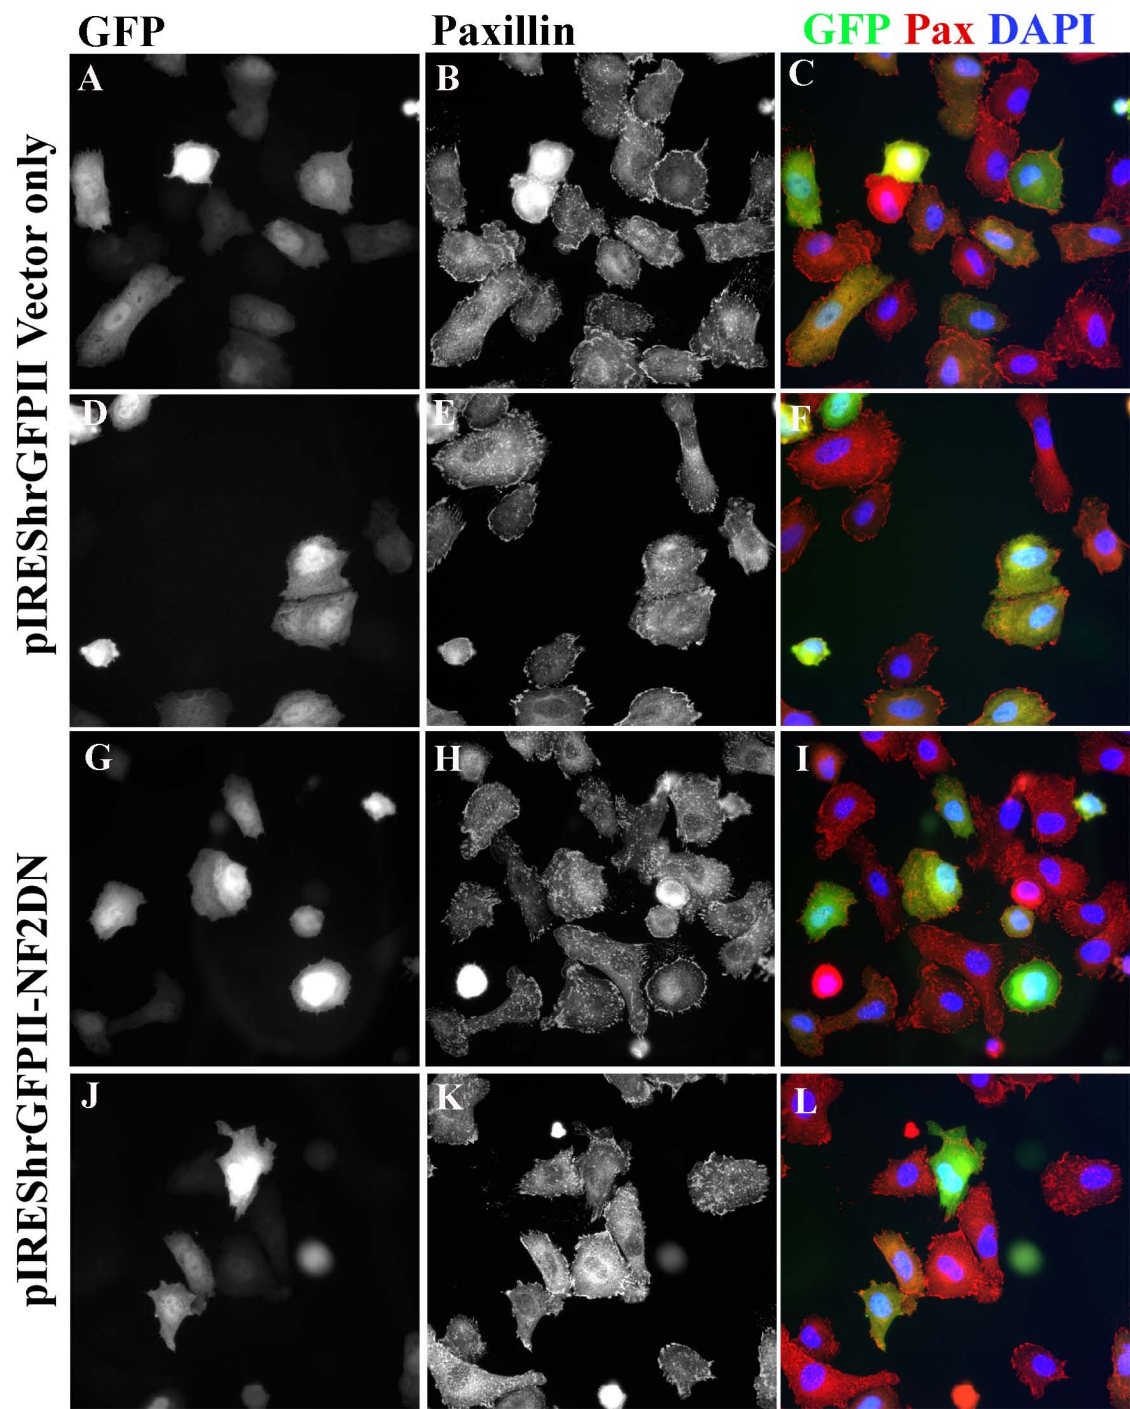

Supplement: pnas_0700044104_9.pdf [file pnas_0700044104_9.pdf]
